# Supplementary material for: Overexpression of a Malus baccata MYB Transcription Factor Gene MbMYB4 Increases Cold and Drought Tolerance in Arabidopsis thaliana
Source: MDPI journal article supplement (doi:10.3390/ijms23031794), 2022-02-04
Supplement: s1 [file s1]

**Table S1** List of primers used in this study.

| Primer Name         | Primer Sequence (5'→3')                        | Purpose                            |
|---------------------|------------------------------------------------|------------------------------------|
| <i>MbMYB4</i> -F    | ATGGTTAGAACTCCTTGCCG                           | full-length cDNA of <i>MbMYB4</i>  |
| <i>MbMYB4</i> -R    | TCAAAATAGTGGATACAAAACTCGG                      | full-length cDNA of <i>MbMYB4</i>  |
| <i>site</i> -F      | GCTCTAGAATGGATGCTTTCTCT                        | PCR for restriction site insertion |
| <i>site</i> -R      | CGGGATCCAATGGAAAACTC                           | PCR for restriction site insertion |
| <i>MbMYB4</i> -qF   | TGCCGTGATGAAAATGGAAT                           | qPCR                               |
| <i>MbMYB4</i> -qR   | TTTTTCGTGTAATTTGATGATAGTT                      | qPCR                               |
| <i>Actin</i> -F     | ACACGGGGAGGTAGTGACAA                           | qPCR                               |
| <i>Actin</i> -R     | CCTCCAATGGATCCTCGTTA                           | qPCR                               |
| <i>HR</i> -F        | GGACAGGGTACCCGGGGATCCATGGTTAGAACTCCTTGCCG      | PCR for homologous recombination   |
| <i>HR</i> -R        | CTGGCATGCCTGCAGGTCGACAAATAGTGGATACAAAACTCGGAAT | PCR for homologous recombination   |
| <i>AtCBF1</i> -F    | TCGGGACTTTCCAAACCG                             | qPCR                               |
| <i>AtCBF1</i> -R    | CCATCTCCTTCGCCGTCAT                            | qPCR                               |
| <i>AtCBF3</i> -F    | TCCGGTAAGTGGGTTTGTGAG                          | qPCR                               |
| <i>AtCBF3</i> -R    | AACTCGGCATCTCAAACATCG                          | qPCR                               |
| <i>AtCOR15a</i> -F  | CAACAGAGGAATCACCAGCGA                          | qPCR                               |
| <i>AtCOR15a</i> -R  | CTCTGCTGTCTTGTCGTGGTGT                         | qPCR                               |
| <i>AtRD29a</i> -F   | CAACGAGGGGAAGATAAAAGTGT                        | qPCR                               |
| <i>AtRD29a</i> -R   | AGCCAGATGATTTTGGAGCCT                          | qPCR                               |
| <i>AtNCED3</i> -F   | ATGGCTTCTTCACGGCACGG                           | qPCR                               |
| <i>AtNCED3</i> -R   | TTCTTTGCCCTCGGACG                              | qPCR                               |
| <i>AtSnRK2.4</i> -F | GAGGAAATGGGGATGCAGAT                           | qPCR                               |
| <i>AtSnRK2.4</i> -R | TTCTCACTTCTCCACTTGCG                           | qPCR                               |
| <i>AtCAT1</i> -F    | CGCCATGCCGAAAAATACCC                           | qPCR                               |
| <i>AtCAT1</i> -R    | CTTGCTGTCTGAATCCCAGGAC                         | qPCR                               |
| <i>AtP5CS</i> -F    | GATACGGATATGGCAAAGCG                           | qPCR                               |
| <i>AtP5CS</i> -R    | CCAAGTCCAAATCGGAAACC                           | qPCR                               |
| <i>AtActin</i> -F   | CCCGCTATGTATGTCGC                              | qPCR                               |
| <i>AtActin</i> -R   | AAGGTCAAGACGGAGGAT                             | qPCR                               |

**Table S2** List of physiological index measurement methods used in this study.

| Physiological Indicators | Calculation Formulas                                                                                                     | Explanations                                                                                                                                                                                                                                                                                                                                    |
|--------------------------|--------------------------------------------------------------------------------------------------------------------------|-------------------------------------------------------------------------------------------------------------------------------------------------------------------------------------------------------------------------------------------------------------------------------------------------------------------------------------------------|
| Chlorophyll content      | $\text{Chl}(\text{g} \cdot \text{kg}^{-1}) = (12.7A_{663} - 2.69A_{645}) V/W + (22.9A_{645} - 4.68A_{663}) V/W$          | A: absorbance value; V: total volume of reaction solution (mL); W: fresh weight of sample (kg).                                                                                                                                                                                                                                                 |
| Proline content          | $\text{Pro}(\mu\text{g/g}) = C \cdot V/W \cdot v_1$                                                                      | C: proline content calculated from the standard curve ( $\mu\text{g}$ ); V: total volume of extract solution (mL); W: fresh weight of sample (g); $v_1$ : volume of extract solution used in the measurement (mL).                                                                                                                              |
| Relative conductivity    | $\text{Rel} = R_1 / R_2 \cdot 100\%$                                                                                     | $R_1$ : leachate conductivity; $R_2$ : leachate conductivity after cooling.                                                                                                                                                                                                                                                                     |
| POD activity             | $\text{POD}(\text{U/gropt}) = \Delta A \cdot V / 0.01 \cdot v_2 \cdot \Delta t \cdot W$                                  | $\Delta A$ : difference value in absorbance; V: total volume of reaction solution (mL); $v_2$ : volume of enzyme solution added (mL); $\Delta t$ : reaction response time; W: fresh weight of sample (g). Take the $A_{470}$ drop by 0.01 in 1 min as 1 POD activity unit (U).                                                                  |
| CAT activity             | $\text{CAT}(\text{U/gropt}) = \Delta A \cdot V / 0.01 \cdot v_3 \cdot \Delta t \cdot W$                                  | $\Delta A$ : difference value in absorbance; V: total volume of reaction solution (mL); $v_3$ : volume of enzyme solution added (mL); $\Delta t$ : reaction response time; W: fresh weight of sample (g). Take the $A_{600}$ drop by 0.01 in 1 min as 1 enzyme activity unit (U).                                                               |
| MDA activity             | $\text{MDA}(\text{nmol/g}) = (\Delta A_{532} - \Delta A_{600}) \cdot V \cdot v_4 / 1.55 \cdot 10^{-1} \cdot W \cdot v_5$ | $\Delta A_{532}$ : difference value between absorbance at 532 and 450; $\Delta A_{600}$ : difference value between absorbance at 600 and 450; V: total volume of reaction solution (mL); $v_4$ : total volume of extract solution (mL); W: fresh weight of sample (g); $v_5$ : volume of the extract solution added in the color reaction (mL). |

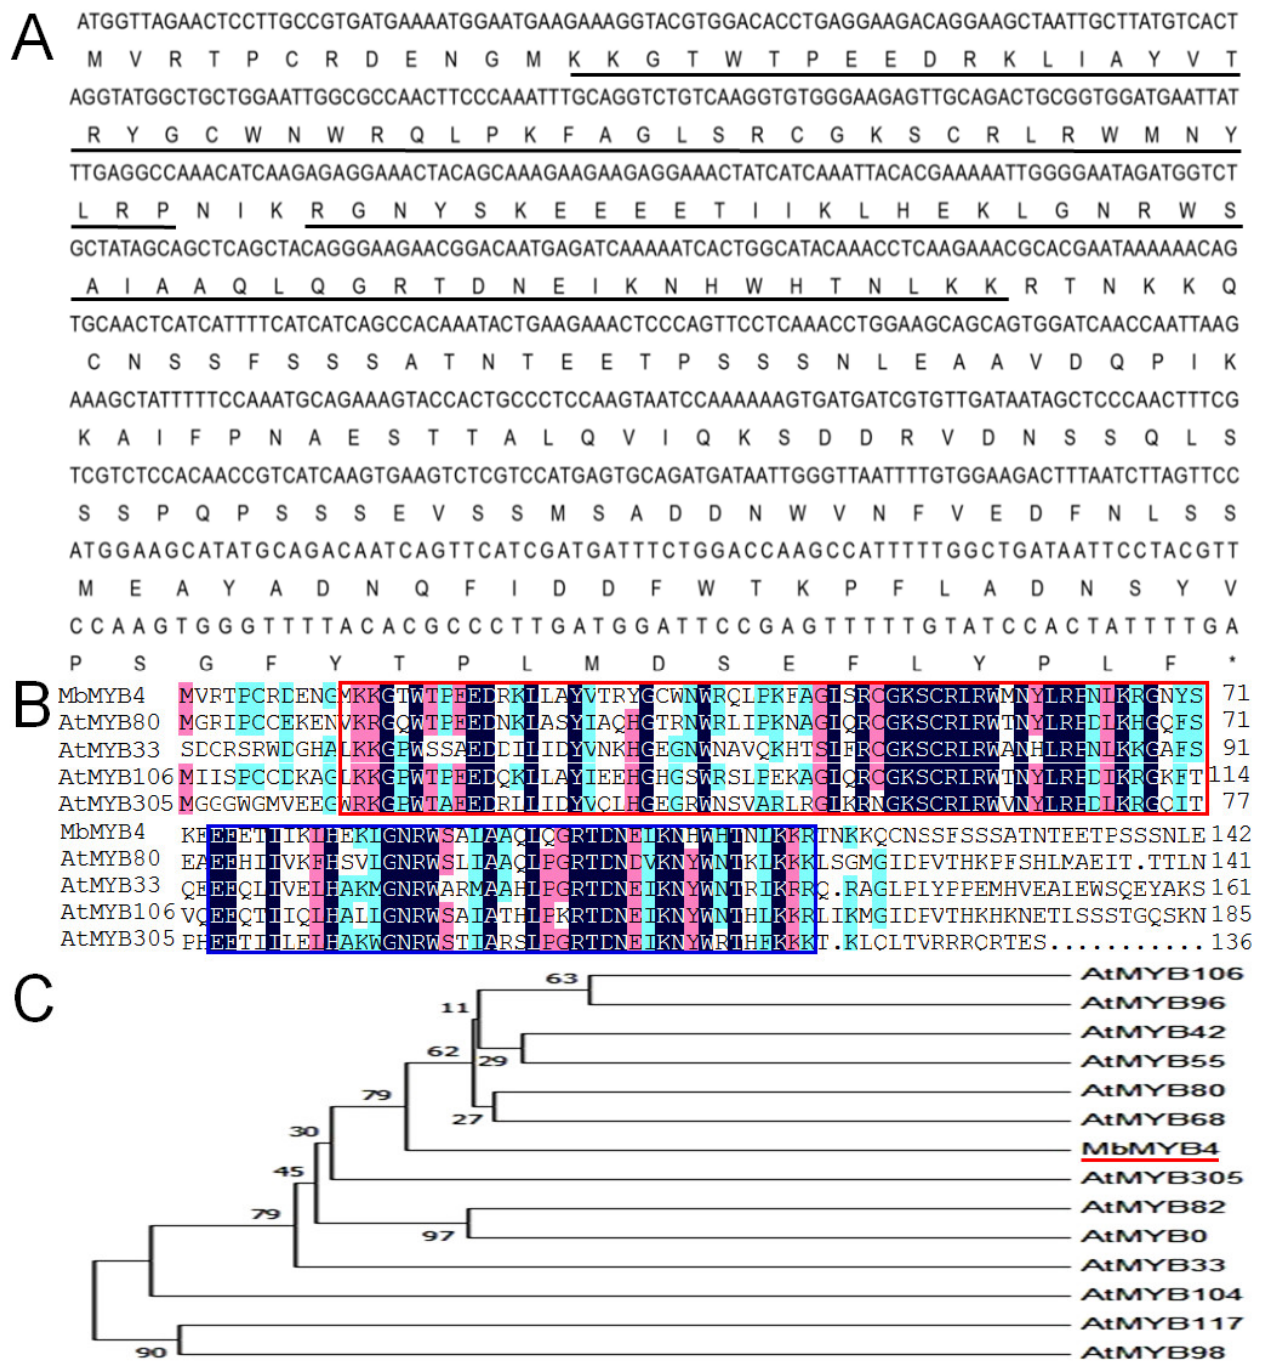

**Figure S1.** (A) Nucleotide and deduced amino acid sequences of *MbMYB4* gene. The conserved domain of R2 and R3 is underlined. (B) Comparison of homology between *MbMYB4* and several *Arabidopsis thaliana* MYB proteins in order to point to the conservative domains. The sequence in the red and blue frame is the conserved amino acid sequence. (C) Phylogenetic tree analysis of *MbMYB4* and *A. thaliana* MYB proteins. The accession numbers are as follows: AtMYB106 (*A. thaliana*, NP\_186763.2), AtMYB96 (NP\_851248.1), AtMYB42 (NP\_567390.4), AtMYB55 (NP\_001118913.1), AtMYB80 (NC\_003076.8), AtMYB68 (NP\_201380.1), AtMYB305 (AAB38777.1), AtMYB82 (NP\_680426.1), AtMYB0 (NP\_189430.1), AtMYB33 (NP\_196228.1), AtMYB104 (NP\_180263.5), AtMYB117 (NP\_564261.1), AtMYB98 (NP\_193612.1).

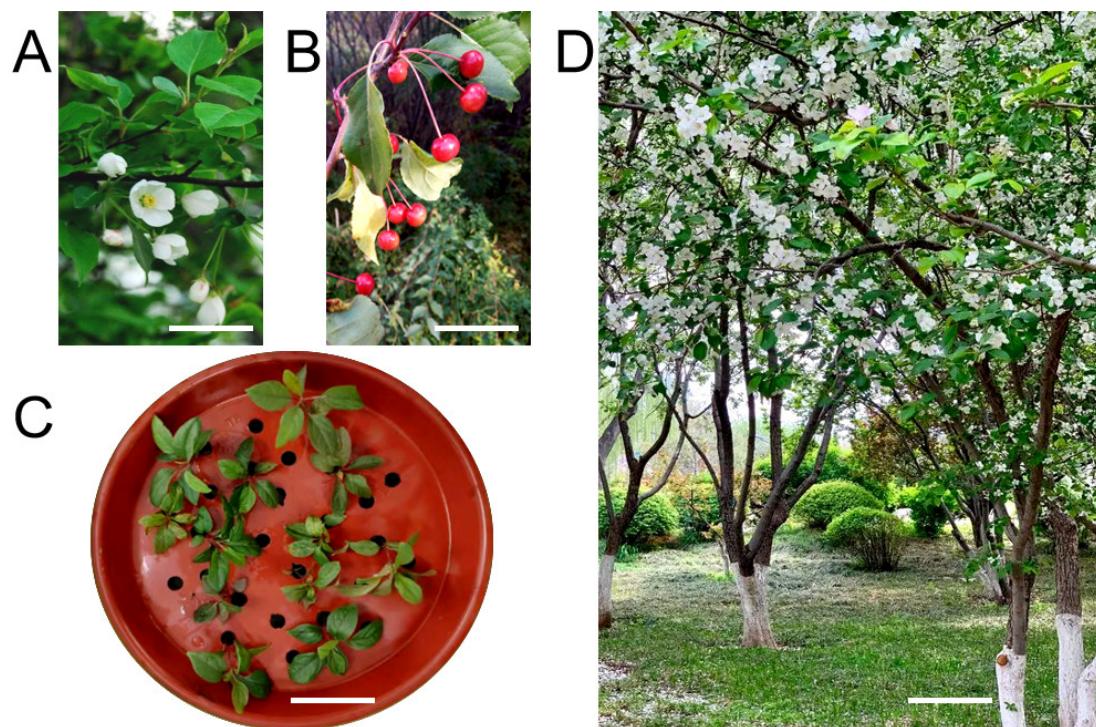

**Figure S2.** Flowers and twigs (A), fruits (B), hydroponic plantlets (C) of *Malus baccata*. Scale bars correspond to 5 cm. (D) Plants of *Malus baccata*. Scale bars correspond to 5 dm.
